# Supplementary material for: Mesoporous KIT-6 silica–polydimethylsiloxane (PDMS) mixed matrix membranes for gas separation
Source: Royal Society of Chemistry journal article supplement (doi:10.1039/c4ta07127a), 2015-01-01
Supplement: c4ta07127a1.pdf [file c4ta07127a1.pdf]

## Supporting Information

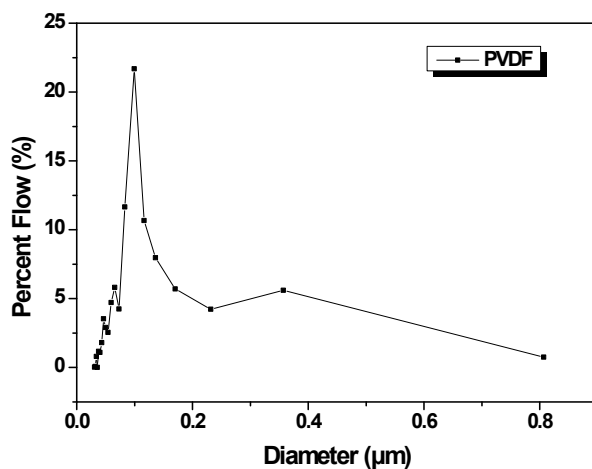

**Figure S1.** Pore size distribution of the PVDF ultrafiltration membrane.  
(The data was obtained from POROLUX 1000, IB-FT Germany)

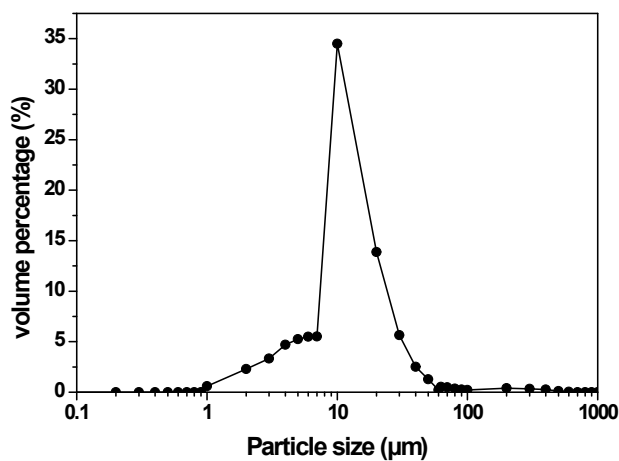

**Figure S2.** Particle size distribution of p-KIT-6.  
(The data was obtained from the laser particle analyzer (Mastersizer 2000, Malvern, UK))

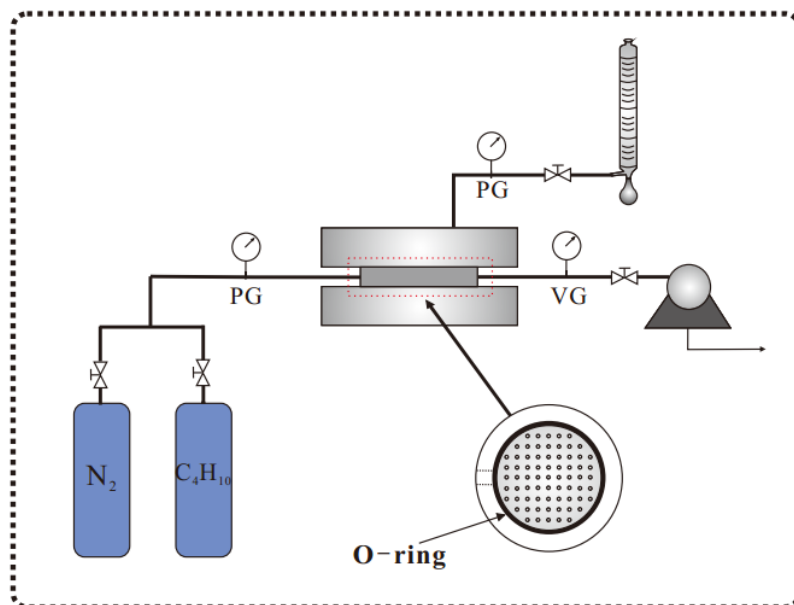

**Figure S3.** Schematic diagram of experimental setup for gas permeation.

**Table S1.** Properties of KIT-6 and p-KIT-6

| Sample  | $S_B$<br>( $\text{m}^2 \text{g}^{-1}$ ) | D<br>(nm) | $V_{\text{tot}}$<br>( $\text{cm}^3 \text{g}^{-1}$ ) | $V_{\text{mic}}$<br>( $\text{cm}^3 \text{g}^{-1}$ ) | $S_{\text{mic}}$<br>( $\text{m}^2 \text{g}^{-1}$ ) | Bulk density<br>( $\text{g cm}^{-3}$ ) |
|---------|-----------------------------------------|-----------|-----------------------------------------------------|-----------------------------------------------------|----------------------------------------------------|----------------------------------------|
| KIT-6   | 793                                     | 4.9       | 1.04                                                | 0.07                                                | 124                                                | -                                      |
| p-KIT-6 | 742                                     | 4.8       | 0.97                                                | 0.05                                                | 84                                                 | 2.8852                                 |

**Table S2.** Onset degradations of MMMs at different p-KIT-6 loadings

| KIT-6/PDMS<br>(wt.%) | T(onset degradation)<br>(°C) |
|----------------------|------------------------------|
| 0                    | 258.58                       |
| 2                    | 304.53                       |
| 10                   | 303.23                       |
| 25                   | 271.3                        |

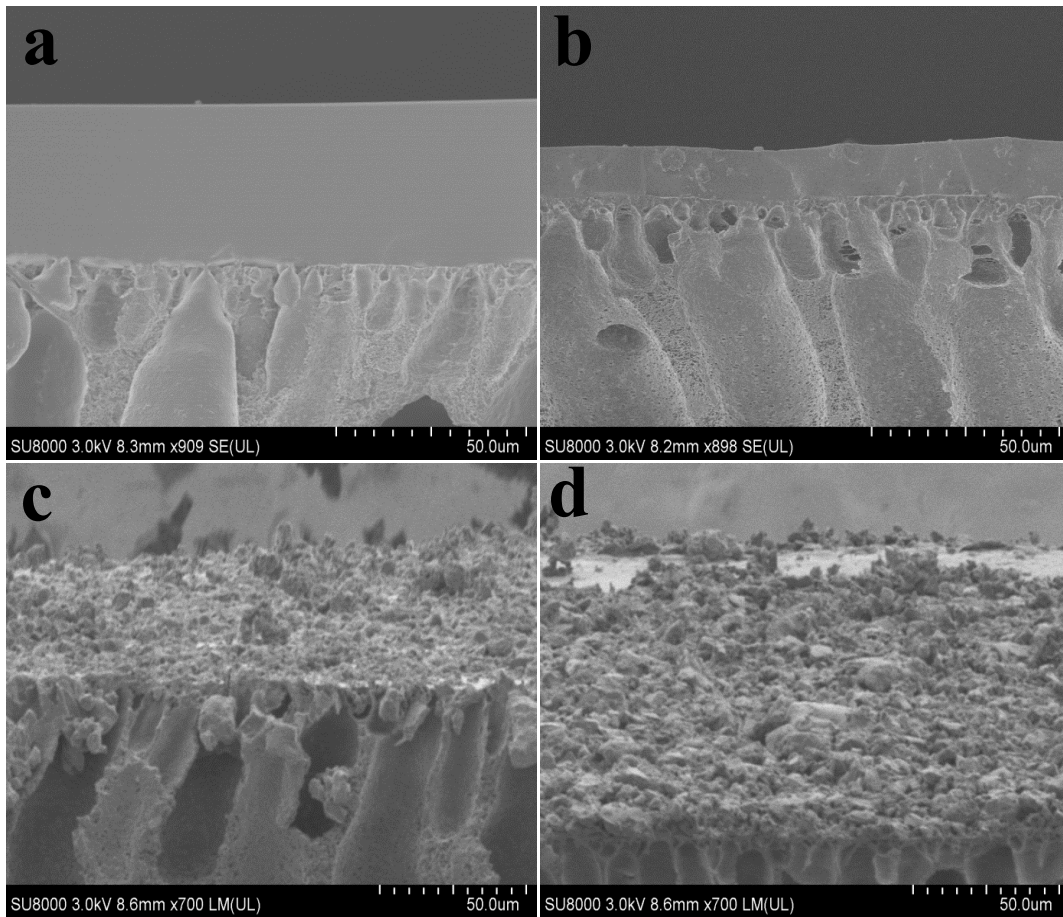

**Figure S4.** Cross-sectional FESEM images of (a) pure membrane, (b) 2wt.% MMM, (c) 10wt.% MMM and (d) 25wt.% MMM.
